# Supplementary material for: A self-powered electrochemical aptasensor for the detection of 17β-estradiol based on carbon nanocages/gold nanoparticles and DNA bioconjugate mediated biofuel cells
Source: Royal Society of Chemistry journal article supplement (doi:10.1039/d4an00085d), 2024-01-01
Supplement: d4an00085d1.pdf [file d4an00085d1.pdf]

## Supporting Information

**A self-powered electrochemical aptasensor for detection of 17 $\beta$ -estradiol based on carbon nanocages/gold nanoparticles and DNA bioconjugate mediated biofuel cells**

Yongju Wu,<sup>‡</sup> <sup>a</sup> Dan Luo,<sup>‡</sup> <sup>a</sup> Jinfei Yi,<sup>a</sup> Rong Li,<sup>a</sup> Dan Yang,<sup>a</sup> Pengfei Pang,<sup>\*a</sup> Hongbin Wang,<sup>a</sup>  
Wenrong Yang<sup>a</sup> and Yanli Zhang<sup>\*a</sup>

<sup>a</sup> *Functional Nanomaterial-based Chemical and Biological Sensing Technology Innovation Team of Department of Education of Yunnan Province, Yunnan Minzu University, Kunming 650504, P. R. China. E-mail: pfpang@aliyun.com, ylzhang@ymu.edu.cn*

<sup>b</sup> *School of Life and Environmental Sciences, Deakin University, Geelong, VIC 3217, Australia*

## Supporting figure captions:

**Fig. S1** SEM images of (A) PB and (B) PB@PDA.

**Fig. S2** (A) SEM and (B) TEM images of prepared CNCs.

**Fig. S3** XPS spectra of (A) C 1s and (B) Au 4f of CNCs/AuNPs nanocomposite.

**Fig. S4** CV plots of CNCs/AuNPs/ITO biocathode in the absence (a) and presence (b) of 5 mM glucose in 100 mM PBS (pH 7.4).

**Fig. S5** Feasibility of the proposed BFCs-based electrochemical aptasensor.  $E^{OCV}$  responses of BFCs-based electrochemical aptasensor in absence (a) and presence (b) of 0.1 ng/mL E2 in 100 mM PBS (pH 7.4).

**Fig. S6** Optimization of experimental parameters. The effects of concentrations of (A)  $\text{Fe}(\text{CN})_6^{3-}$ , (B) aptamer, (C) incubation time of PMNPs and aptamer, and (D) incubation time of E2 and PMNPs@aptamer on  $E^{OCV}$  response of BFCs-based electrochemical aptasensor. The assays were carried out in 100 mM PBS (pH 7.4) containing 1 ng/mL E2.

**Fig. S7** Stability of BFCs-based self-powered electrochemical aptasensor.

## Table S1

Comparison of the analytical performances of BFCs-based self-powered aptasensor with other sensors for E2 detection

## Table S2

Determined results of E2 in milk and tap water samples using proposed method

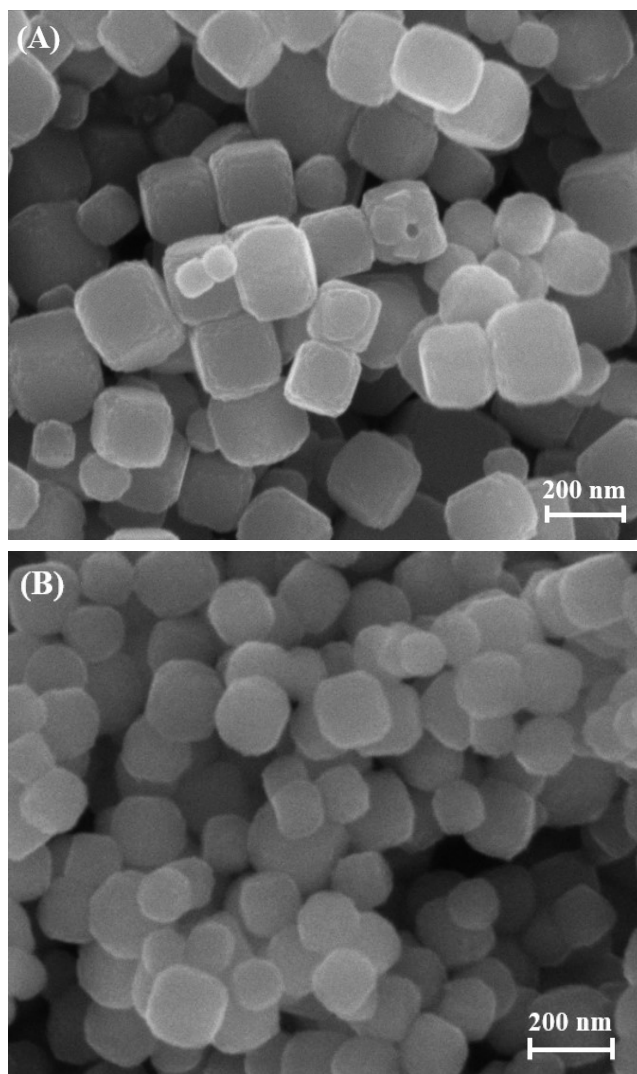

**Fig. S1** SEM images of (A) PB and (B) PB@PDA.

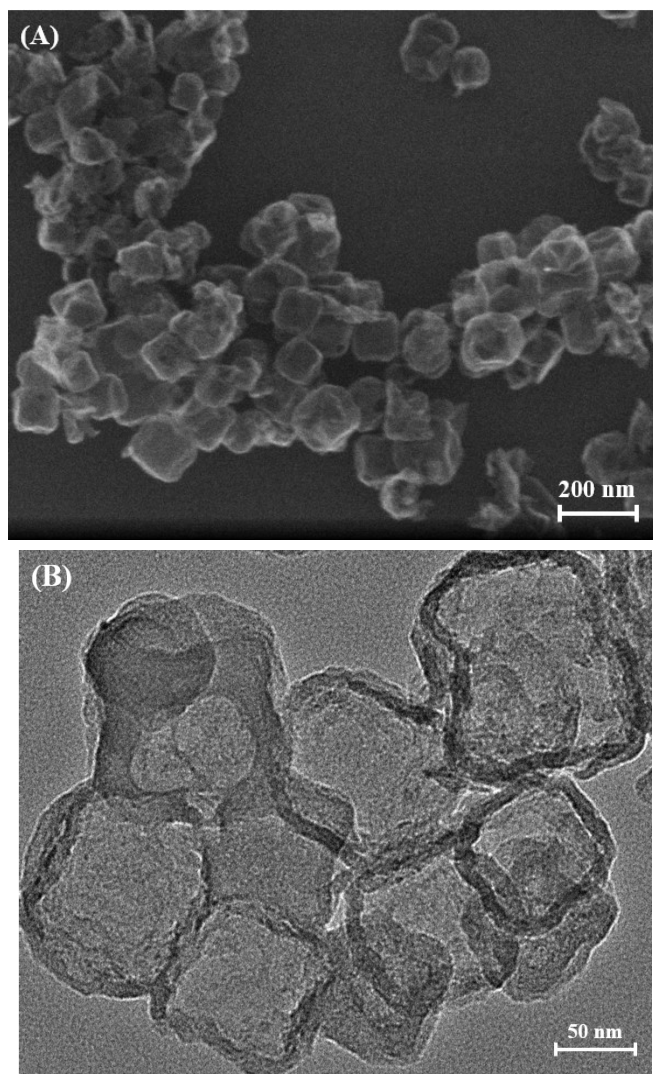

**Fig. S2** (A) SEM and (B) TEM images of prepared CNCs.

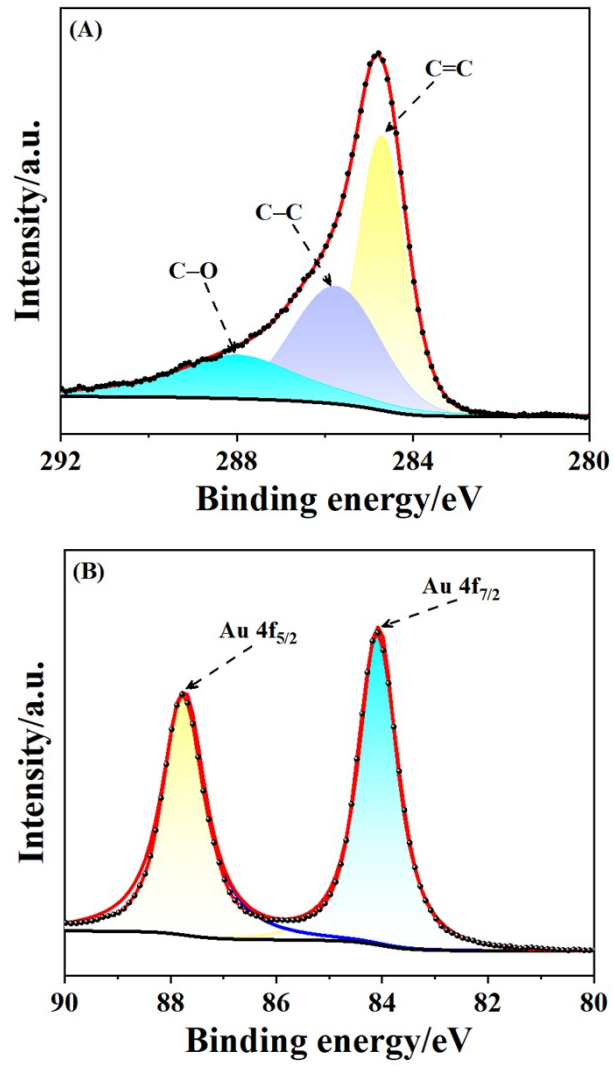

**Fig. S3** XPS spectra of (A) C 1s and (B) Au 4f of CNCs/AuNPs nanocomposite.

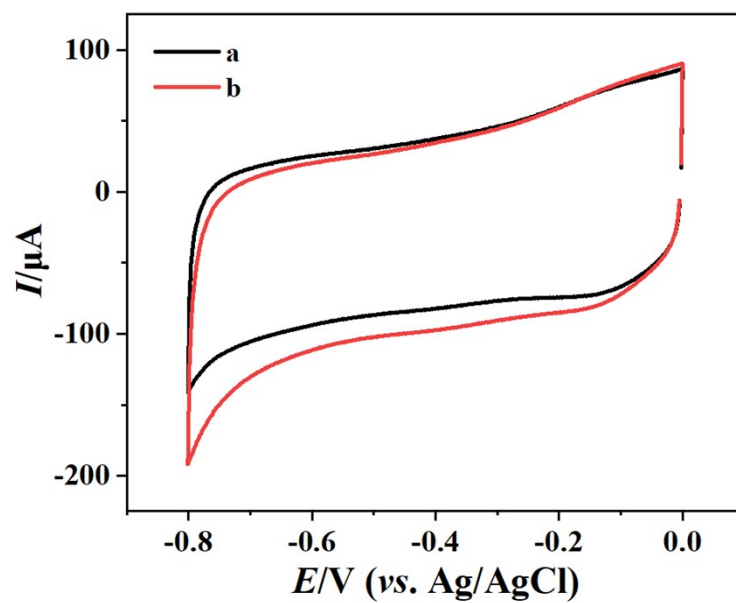

**Fig. S4** CV plots of CNCs/AuNPs/ITO biocathode in the absence (a) and presence (b) of 5 mM glucose in 100 mM PBS (pH 7.4).

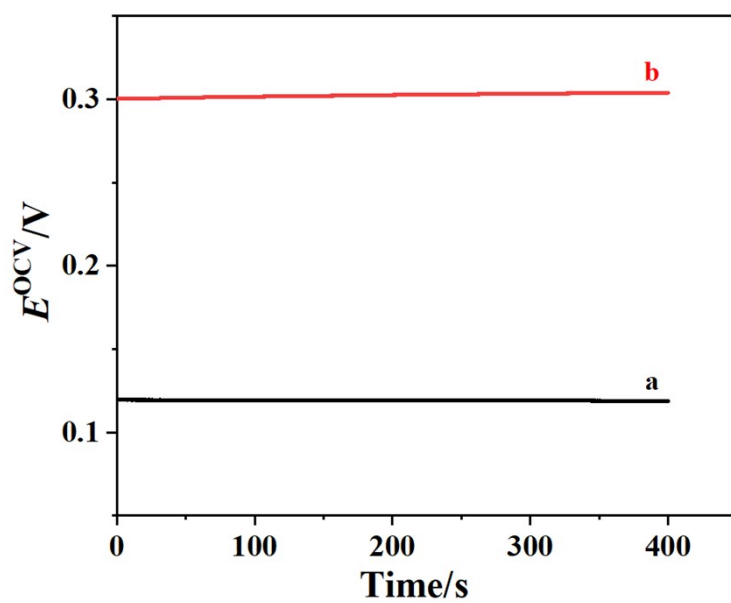

**Fig. S5** Feasibility of the proposed BFCs-based electrochemical aptasensor.  $E^{OCV}$  responses of BFCs-based electrochemical aptasensor in absence (a) and presence (b) of 1 ng/mL E2 in 100 mM PBS (pH 7.4).

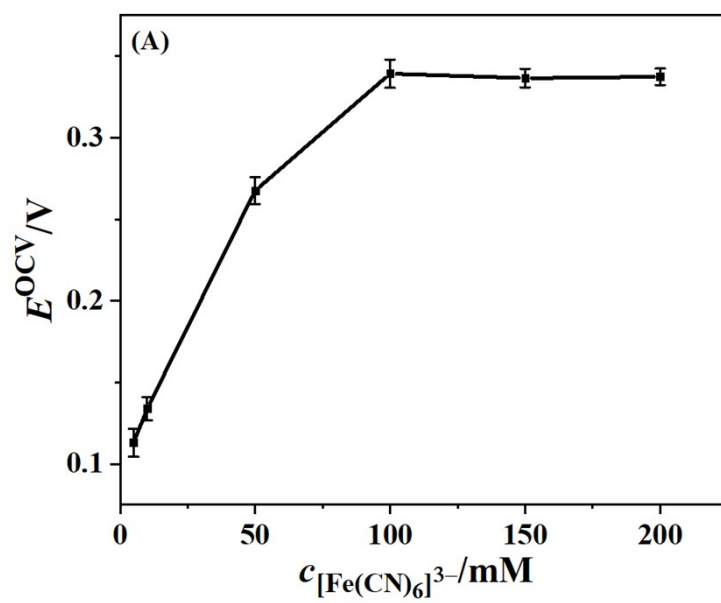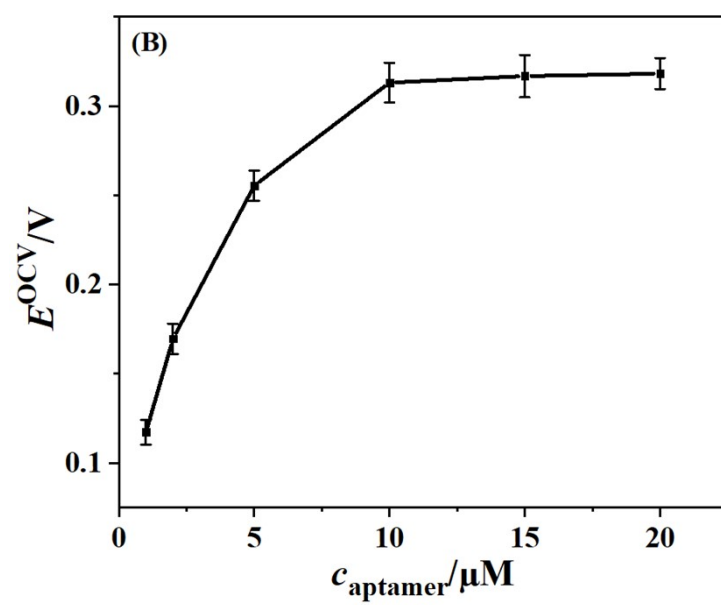



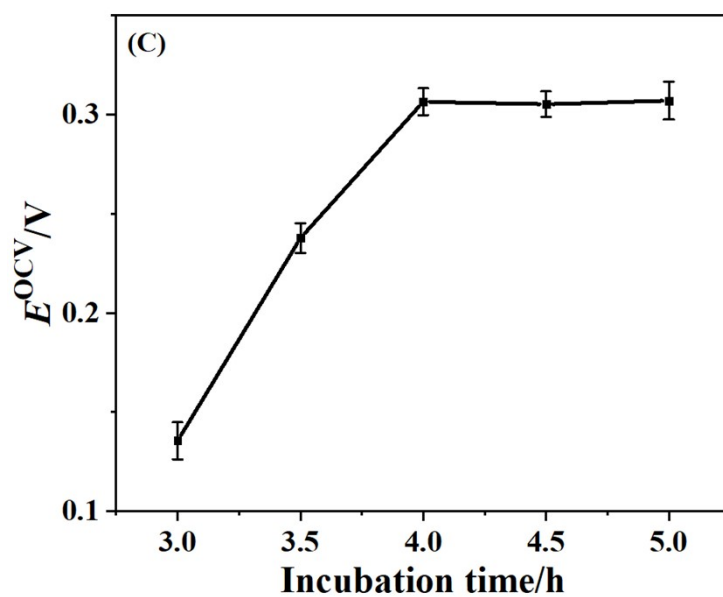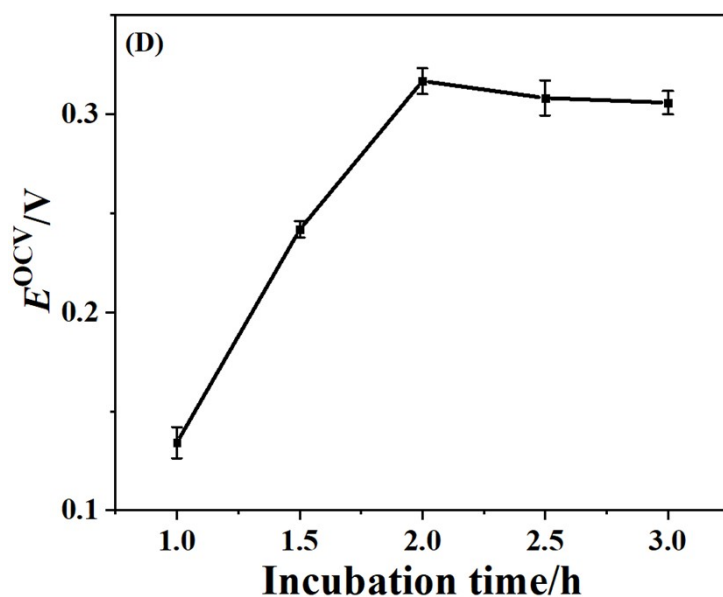

**Fig. S6** Optimization of experimental parameters. The effects of concentrations of (A)  $\text{Fe}(\text{CN})_6^{3-}$ , (B) aptamer, (C) incubation time of PMNPs and aptamer, and (D) incubation time of E2 and PMNPs@aptamer on  $E^{OCV}$  response of BFCs-based electrochemical aptasensor. The assays were carried out in 100 mM PBS (pH 7.4) containing 1 ng/mL E2.

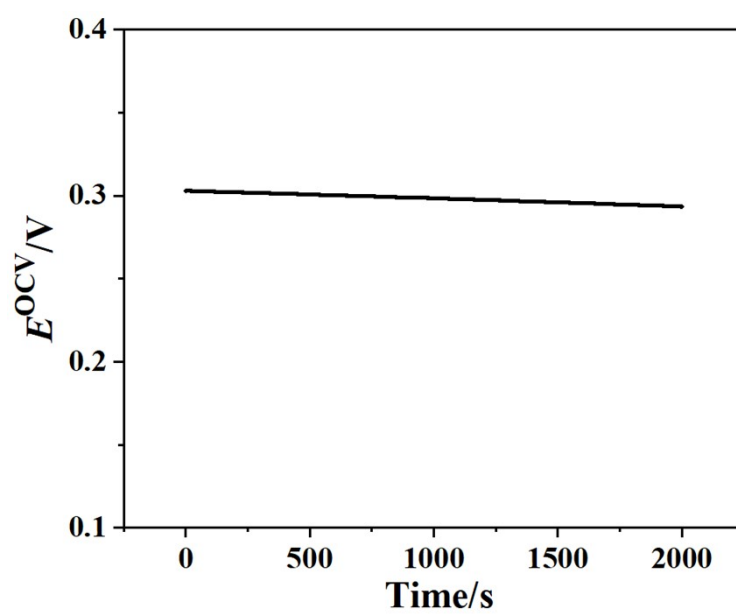

**Fig. S7** Stability of BFCs-based self-powered electrochemical aptasensor.

**Table S1**

Comparison of the analytical performances of BFCs-based self-powered aptasensor with other sensors for E2 detection

| Strategy                                                                                  | Technique   | Linear range<br>( $\mu\text{g mL}^{-1}$ ) | LOD<br>( $\mu\text{g mL}^{-1}$ ) | Ref.             |
|-------------------------------------------------------------------------------------------|-------------|-------------------------------------------|----------------------------------|------------------|
| AuNPs-aptamer                                                                             | CL          | $10^2 - 10^8$                             | 100                              | 1                |
| AuNPs-Ab                                                                                  | CL          | $3 - 10^5$                                | 3                                | 2                |
| MIL-53-aptamer/RuSiO <sub>2</sub> -cDNA                                                   | FL          | $136 - 2.7 \times 10^5$                   | 54.5                             | 3                |
| CQDs-aptamer/Fe <sub>3</sub> O <sub>4</sub> -cDNA                                         | FL          | $2.7 - 2.7 \times 10^5$                   | 0.95                             | 4                |
| Ru(bpy) <sub>3</sub> <sup>2+</sup> -aptamer/cDNA                                          | ECL         | $2.7 - 2.7 \times 10^3$                   | 0.3                              | 5                |
| Ru(II) derivative-InVO <sub>4</sub> /β-AgVO <sub>3</sub>                                  | ECL         | $0.27 - 2.7 \times 10^4$                  | 0.07                             | 6                |
| ZnIn <sub>2</sub> S <sub>4</sub> @NH <sub>2</sub> -MIL-125(Ti)/<br>PDA NS/Mn:ZnCdS QDs-Ab | PEC         | $0.5 - 2 \times 10^4$                     | 0.3                              | 7                |
| CdS@C NRs/ALP-aptamer                                                                     | PEC         | $272 - 6.8 \times 10^4$                   | 100                              | 8                |
| split aptamer-3D DNA walker                                                               | EC          | $0.27 - 1.36 \times 10^5$                 | 0.076                            | 9                |
| MWCNTs/thionine/AuNPs/SPWE                                                                | EC          | $10 - 10^5$                               | 10                               | 10               |
| SnS <sub>2</sub> -aptamer                                                                 | PFCs        | $272 - 1.36 \times 10^4$                  | 33                               | 11               |
| <b>CNCs/AuNPs-DNA bioconjugate</b>                                                        | <b>BFCs</b> | <b><math>0.5 - 1.5 \times 10^4</math></b> | <b>0.16</b>                      | <b>This work</b> |

**Table S2**

Determined results of E2 in milk and tap water samples using proposed method

| Samples   | Spiked ( $\text{ng mL}^{-1}$ ) | Found ( $\text{ng mL}^{-1}$ ) | Recovery (%) | RSD (%) |
|-----------|--------------------------------|-------------------------------|--------------|---------|
| Milk      | 0                              | —                             | —            | —       |
|           | 1.0                            | 1.04                          | 104.0        | 1.6     |
|           | 5.0                            | 5.04                          | 100.8        | 4.2     |
|           | 15.0                           | 14.64                         | 98.2         | 3.4     |
| Tap water | 0                              | —                             | —            | —       |
|           | 1.0                            | 1.02                          | 102.0        | 1.5     |
|           | 5.0                            | 4.82                          | 96.4         | 4.1     |
|           | 15.0                           | 14.76                         | 98.8         | 3.6     |

## References

- 1 J. C. Liu, W. H. Bai, S. C. Niu, C. Zhu, S. M. Yang and A. L. Chen, *Sci. Rep.*, 2014, **4**, 7571.
- 2 A. Minopoli, N. Sakač, B. Lenyk, R. Campanile, D. Mayer, A. Offenhäusser, R. Velotta and B. D. Ventura, *Sensor. Actuat. B-Chem.*, 2020, **308**, 127699.
- 3 H. F. Sha and B. Yan, *J. Colloid Interf. Sci.*, 2021, **583**, 50–57.
- 4 Q. Y. Wei, P. Y. Zhang, H. B. Pu and D. W. Sun, *Food Chem.*, 2022, **373**, 131591.
- 5 J. J. Zhang, J. T. Cao, G. F. Shi, K. J. Huang, Y. M. Liu and Y. H. Chen, *Anal. Methods*, 2014, **6**, 6796–6801.
- 6 Q. Q. Zhao, J. W. Xue, X. Ren, D. W. Fan, X. Kuang, Y. Y. Li, Q. Wei and H. X. Ju, *Sensor. Actuat. B-Chem.*, 2021, **348**, 130717.
- 7 T. Yan, T. T. Wu, S. Y. Wei, H. Q. Wang, M. Sun, L. G. Yan, Q. Wei and H. X. Ju, *Biosens. Bioelectron.*, 2020, **148**, 111739.
- 8 L. H. Tu, J. H. Zhu, A. Tanjung, M. Wang, J. W. Kang, A. J. Wang, L. P. Mei, Y. D. Xue and P. Song, *Microchim. Acta*, 2022, **189**, 56.
- 9 S. Qi, X. Z. Dong, Y. H. Sun, Y. Zhang, N. Duan and Z. P. Wang, *J. Hazard. Mater.*, 2022, **439**, 129590.
- 10 Y. Wang, J. P. Luo, J. T. Liu, X. R. Li, Z. Kong, H. Y. Jin and X. X. Cai, *Biosens. Bioelectron.*, 2018, **107**, 47–53.
- 11 X. L. Yao, J. Gao, K. Yan, Y. X. Chen and J. D. Zhang, *Anal. Chem.*, 2020, **92**, 8026–8030.
